# Supplementary material for: Prediction of the Effect of Methylation in the Promoter Region of ZP2 Gene on Egg Production in Jinghai Yellow Chickens
Source: MDPI journal article supplement (doi:10.3390/vetsci9100570), 2022-10-16
Supplement: s1 [file s1]

>[chr14:14979735-14980550](#)

TCAGCTGTGGCTTCTCTGAGCGCACGTGGAAGTTTTAGTTGTTATCAAGGCAGAAGGGGTATTTTGAAGTCACA  
TCTTGAGGTTGCTCAGTTATTTGTTCCCTGGGCGGTCATTCCCTCCCAGGTGCTCTATGGACTCTCAGTACCTCC  
TTGCATCCGCCTTCATCACACAAGTTAATTTTTGCTTTCCCTGGAGGTGCAGCCACAGCAGTAAAGTCCAAAGG  
CCCTTTTATTGTGCAGCCACAGCCACGCCTGAGCTCAGCCGTACAGTGGATCTGTGGCAATCCCATCTGGGTG  
TGATATTTTCAAAGCTATTTCTAGGCAAGGAGAACTAAATGCGTCCGAGTAGTTCATCAAATATTCCCCCGATC  
TCCTTTAAGCCATTAGATCGAAAACACAAACCAGGGGACAACCTTAACCTTCATCTCACCCCCAGAACGAACAT  
TTTCTTTACTCTGTTTCCCCCTCCTAAACCTCGCGAGAGAATCACGGCATAAAACATCAGCCCCGAGGGAGC  
GCTGCAGCGATGGGGACACAGTGGCCCATTCAGTGACGCTTCAGGACGGTGCCCTCCACCGTAACGGAAGG  
ATTTGCACTGGGGAGGAAGGGGCTGCTTGGCCACGCTGTGCTCAGCTGTTTGCAGCGCTGGGTGCCCCCTGGGA  
GCGTACAGACAGCACGCGAAGGGACCGCCGTGGCTCAGGCAGCAATTGGGGCGTCGCTGCTGCGGTGGAAT  
GAACGCTAATTGGGGTCGGAGCCACAGGCCCAAGAGAGGGAGGCTGCCCCACTACCCCCCTCCGGCATATG  
ATCTCCAGAGCCTCCAGGCGCCCATGGTACGCGGCCAGCAGCGTGGGCGTCATCCCGTCTCGTCAGAAGCAT  
TGAGGTCTTTCCGAGTGGCTTCTTTAGCAGCTCCAGGTTGCCATCGGCCGCTGCCCTGTGATACCTGCTTGAC  
ATCTTCAGCTGTCAGTAGCCTGCCTGCCGGGACGGCCCGCCACGGCCGGAGCTGCGGCATCATCGCCCAACG  
GGGAGGGCGGCCGAGAGGGTCGAAGTCCTCCCTTGACACTGCGGTGTTCCCGCTTTCCTTCCCTAGCAGCTT  
CTCCACTGCTACCCTACAGCCTCCTTCTTGCCTGGTGTGCTGCCGAAATGCAGGGGGTTTCGTGGTGTGTTTTGGT  
GTCTCGGCTGGTGTGTCAGAACGTTTTTGGGTACAGATGGAGCAATGCGGCTGATTTCTCCAGGCAGCACAG  
GAGCTCCAGCAGCAGCAGCGCAGTGCTCCTGACCCAGTGGGCTGCACACGCTGCTGGTGCCCTATGGGATGGT  
CCATCCGGCCTCATCCTACGGGCACAGTTCTCAGTTTAGACATTATTTCCAGTGATGACAGTGGAGCAATGTC  
CAGTGGAGCCTTCCCCTGTGAGGGAAGGCTTGTGGAAGTAGAGCACAGGGTTGGGTGCTAGAAAAGACTTCT  
CCAAAAGAGCGGTGATGCATTGGAACGGGCTGCCTGGGGGGAGAGGAGTCACCATCTCTGGAGGGATCCAAG  
ATCCATAGAGATGATGTGGGCAGCGGGCAATATTGGTGGTAAGGGGATAATTAGACTGGATGGTCTTGCAGGCC  
ATGAAGATCAGAGGATGGAGCACCTCCATGATGAGCACAGGCTGAGAGAGCTGGGGCTGTTAGCCTGGAGA  
AGAGAAGGCTCCAGAGAGGCCTTATAGTAATCTTCAGGACCTGAAGGGGCCTACAGGAAAGCTGGGGAGGG  
ACTTTTATAGGGGCAGGTAGTGACCAGATGGCTTTAAACTGGAAGAGGGTAGATTAGACTAGCTATTAGGAA  
GAAATCTTTATTGTGAGGGCAGTGAGACACTGGAACAGGTTTCCCCGTGAGGCTGTGGATGCCCCCTCCCTG  
GAAGCACTCCAGGCCAGGCTGGATGGGACGGTGAGCAACCTGGGCTATGGGAGGTGTCCTGCCTACAGCAG  
GGGGGTGGAACGAGGTGGTCTTAA

**Figure S1.** Sequence before the transcription start site of the chicken ZP2 gene.
